# Supplementary material for: Association Between Risk of Clostridium difficile Infection and Duration of Proton Pump Inhibitor or H2-Receptor Antagonist Use in Hospitalized Patients
Source: PubMed Central journal article supplement — Infect Dis Ther. 2024 Jan 30;13(2):373–83. doi: 10.1007/s40121-024-00922-5 (PMC10904693; doi:10.1007/s40121-024-00922-5), 2024-01-30
Supplement: 40121_2024_922_MOESM1_ESM.pdf [file 40121_2024_922_MOESM1_ESM.pdf]

**Association between risk of *Clostridium difficile* infection and duration of proton pump inhibitor or H2-receptor antagonist use in hospitalized patients**

**Running title:** Hospital acquired *Clostridium difficile* infection

Chien-Huei Huang<sup>1,#</sup>, Yung-Hsin Tseng<sup>1,#</sup>, Wen-Shan Tsai<sup>1</sup>, Chien-Chou Su<sup>2,\*</sup>,  
Ching-Lan Cheng<sup>1,3,\*</sup>, Yea-Huei Kao Yang<sup>3,4</sup>, Yu-Ching Chang<sup>3,4</sup>, Yi-Hsuan Liu<sup>3</sup>

<sup>1</sup>*Department of Pharmacy, National Cheng Kung University Hospital, College of Medicine, National Cheng Kung University, Tainan, Taiwan*

<sup>2</sup>*Clinical Innovation and Research Center, National Cheng Kung University Hospital, College of Medicine, National Cheng Kung University, Tainan, Taiwan*

<sup>3</sup>*Institute of Clinical Pharmacy and Pharmaceutical Sciences, College of Medicine, National Cheng Kung University, Tainan, Taiwan*

<sup>4</sup>*Health Outcome Research Center, National Cheng Kung University, Tainan, Taiwan*

# These authors contributed equally to this work

\* Corresponding authors

\* Corresponding authors: Chien-Chou Su

Clinical Innovation and Research Center, National Cheng Kung University Hospital,  
College of Medicine, National Cheng Kung University, Tainan, Taiwan

No. 138 Sheng Li Road, Tainan City 704, Taiwan

Tel.: +886-6-2353535 ext. 6032

Email: [n121692@mail.hosp.ncku.edu.tw](mailto:n121692@mail.hosp.ncku.edu.tw)

\* Corresponding authors: Ching-Lan Cheng

Institute of Clinical Pharmacy and Pharmaceutical Sciences, College of Medicine,  
National Cheng Kung University, Tainan, Taiwan

No. 1 University Road, Tainan City 701, Taiwan

Tel.: +886-6-235-3535 ext. 6208

Fax: +886-6-275-9709

Email: [clcheng@mail.ncku.edu.tw](mailto:clcheng@mail.ncku.edu.tw)

## Supplemental data

**Supplemental Table 1.** Number of incident cases of *Clostridium difficile* infection by calendar year.

| Year | Number of CDI cases |
|------|---------------------|
| 2012 | 1,113               |
| 2013 | 1024                |
| 2014 | 923                 |
| 2015 | 922                 |
| 2016 | 1,004               |
| 2017 | 1,014               |
| 2018 | 933                 |

**Supplemental Table 2.** An example of a matrix for estimating odds ratios in a nested case-control study.

| Antacids    | Length of antiacid use | Case | Control | Odds ratio    |
|-------------|------------------------|------|---------|---------------|
| H2-blockers | $\leq 14$ days         | a    | e       | 1.0           |
|             | 14+ days               | b    | f       | $[b/a]/[f/e]$ |
| PPIs        | $\leq 14$ days         | c    | g       | $[c/a]/[g/e]$ |
|             | 14+ days               | d    | h       | $[d/a]/[h/e]$ |

Case and control represent outcome. Antacid and duration of antacid use represent exposure. We selected the control group with H2 blockers and  $\leq 14$  days as the reference group. Therefore, the unadjusted odds ratios of H2-blocker use and duration of antacid use over 14 days are  $[b/a]/[f/e]$ . The unadjusted odds ratios of PPIs use and duration of antiacid use less 14 days are  $[c/a]/[g/e]$ . The unadjusted odds ratios of PPIs use and duration of antiacid use over 14 days are  $[d/a]/[h/e]$ .

**Supplemental Figure 1.** A framework of study design in this study.

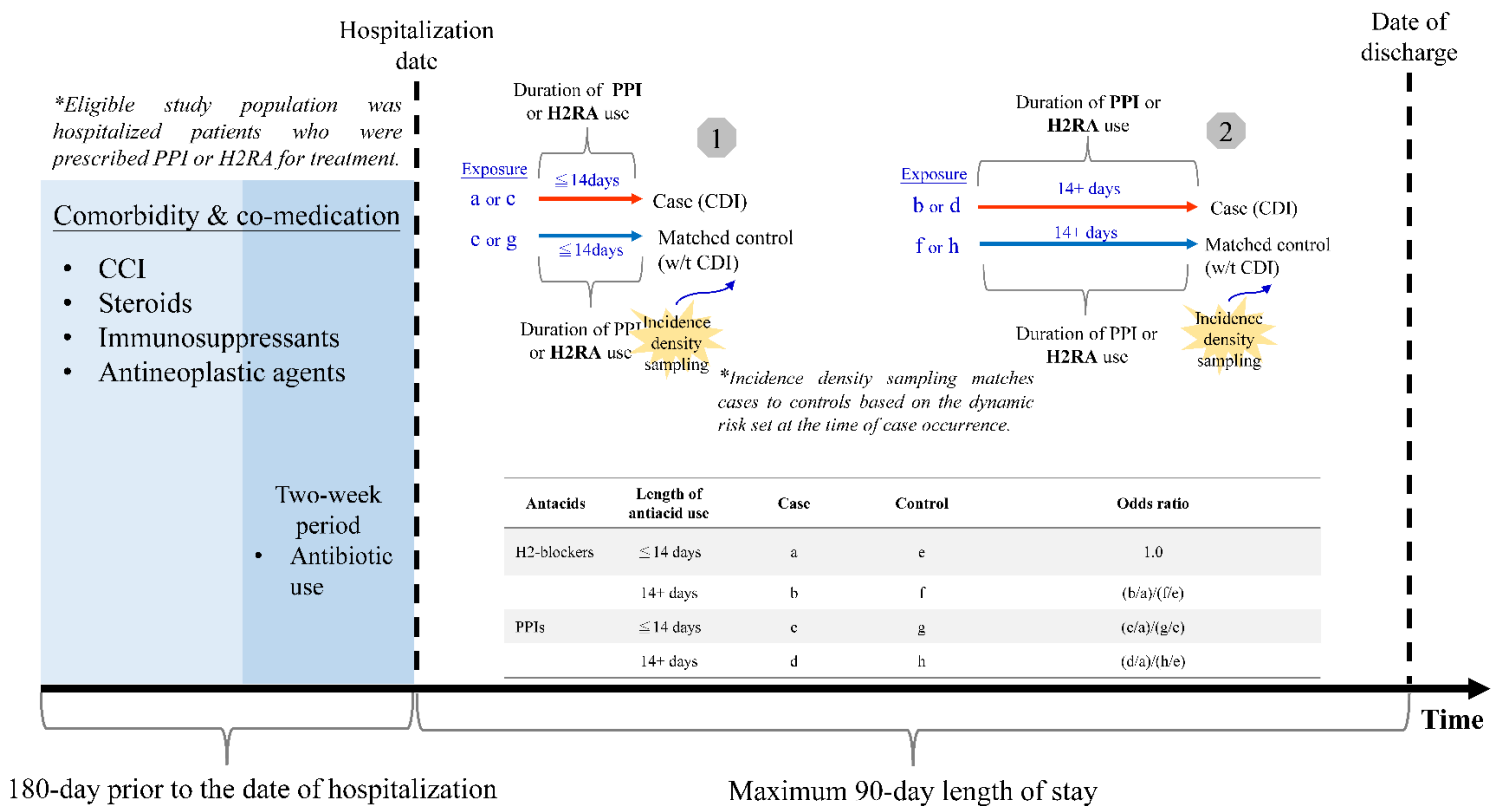

Nested case-control study. The source population (eligible population) was our study cohort of hospitalized patients who were prescribed a PPI or H2RA for treatment. We then followed these patients, and if a patient had CDI during the PPI or H2RA exposure period, it was considered a case. Patients with CDI in this study were considered to be those who received oral metronidazole, fidaxomicin, or vancomycin for treatment at least seven days. If a patient becomes a case, we would randomly select a patient who did not have CDI at that time from the source population and matched by age, sex, and calendar year of entry into the cohort according to incidence density sampling as a control until the end of follow-up during the PPI or H2RA exposure period. The final case and control groups were matched to a case on a 1:1 basis for age, sex, and calendar year of cohort entry. Duration of PPI or H2RA use was based on PPI or H2RA exposure days in an as-treated design. PPI or H2RA exposure days began on the date of the first prescription and were censored at the date of discontinuation, switching, death, occurrence of CDI, hospital discharge, or the end of the study period after the first prescription, whichever occurred first. Discontinuation was defined as patients who stopped receiving PPIs or H2RAs within 7 days after the date of the last prescription.
